# Supplementary material for: Hydrograph separation: an impartial parametrisation for an imperfect method
Source: Copernicus journal article supplement (doi:10.5194/hess-24-1171-2020), 2020-03-11
Supplement: Supplementary file 1 [file hess-24-1171-2020-supplement.pdf]

Supplement of Hydrol. Earth Syst. Sci., 24, 1171–1187, 2020  
<https://doi.org/10.5194/hess-24-1171-2020-supplement>  
© Author(s) 2020. This work is distributed under  
the Creative Commons Attribution 4.0 License.

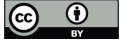

*Supplement of*

## **Hydrograph separation: an impartial parametrisation for an imperfect method**

**Antoine Pelletier and Vazken Andréassian**

*Correspondence to:* Antoine Pelletier ([antoine.pelletier@inrae.fr](mailto:antoine.pelletier@inrae.fr))

The copyright of individual parts of the supplement might differ from the CC BY 4.0 License.

# Package ‘baseflow’

November 13, 2019

**Type** Package

**Title** Computes Hydrograph Separation

**Version** 0.11.2

**Date** 2019-11-05

**Depends** R (>= 3.0.3)

**Imports** methods, graphics, airGR

**Description** Computes hydrograph separation using the conceptual automated process from Pelletier and Andreassian (2019) <doi:10.5194/hess-2019-503>. Contains scalar and vectorized functions to compute correlation criterion to calibrate the baseflow separation model.

**License** GPL-2

**SystemRequirements** cargo (>= 1.36.0), rustc, GNU make

**Collate** REXPORT.R BasinData.R BaseflowFilter.R Criteria.R

**Contact** antoine.pelletier@irstea.fr

**Encoding** UTF-8

**NeedsCompilation** yes

**Author** Antoine Pelletier [cre, aut] (<<https://orcid.org/0000-0002-1286-9147>>),  
Vazken Andréassian [ths, rev] (<<https://orcid.org/0000-0001-7124-9303>>),  
Olivier Delaigue [rev, ctb, dtc]  
(<<https://orcid.org/0000-0002-7668-8468>>)

**Maintainer** Antoine Pelletier <[antoine.pelletier@irstea.fr](mailto:antoine.pelletier@irstea.fr)>

**Repository** CRAN

**Date/Publication** 2019-11-13 16:20:02 UTC

## R topics documented:

|                                |   |
|--------------------------------|---|
| BaseflowFilter . . . . .       | 2 |
| BaseflowFilter-class . . . . . | 3 |
| BasinData . . . . .            | 5 |
| BasinData-class . . . . .      | 6 |
| bfi . . . . .                  | 7 |

|                             |    |
|-----------------------------|----|
| corr_crit . . . . .         | 9  |
| corr_crit_vect . . . . .    | 10 |
| perform_filtering . . . . . | 12 |

|              |           |
|--------------|-----------|
| <b>Index</b> | <b>14</b> |
|--------------|-----------|

---

|                |                                                     |
|----------------|-----------------------------------------------------|
| BaseflowFilter | <i>Constructor function of class BaseflowFilter</i> |
|----------------|-----------------------------------------------------|

---

### Description

Standard construction function of BaseflowFilter objects, used by package baseflow to store filtering information for a given catchment. The object is created with NA values of baseflow and level of filtering reservoir, it is then necessary to run perform\_filtering function to compute them.

### Usage

```
BaseflowFilter(BasinData, alpha, updateFunction = "quadr")
```

### Arguments

|                |                                                                                                          |
|----------------|----------------------------------------------------------------------------------------------------------|
| BasinData      | A BasinData object containing hydroclimatic data for the catchment under study.                          |
| alpha          | Numeric parameter of the filtering reservoir. Its dimension depends on the used update function.         |
| updateFunction | Character string giving reservoir function : must be one of "quadr", "lin" or "exp". Defalut is "quadr". |

### Value

A BaseflowFilter object containing provided data. Baseflow numeric field R and reservoir level V are filled with NA, it is thus necessary to call perform\_filtering function to compute R and V.

### Author(s)

Pelletier and Andreassian (<antoine.pelletier@irstea.fr>)

### References

Pelletier, A. and Andréassian, V.: Hydrograph separation: an impartial parametrization for an imperfect method, Hydrol. Earth Syst. Sci. Discuss., <https://doi.org/10.5194/hess-2019-503>, in review, 2019

**See Also**[BasinData](#)[BaseflowFilter](#)[BasinData](#)[perform\\_filtering](#)**Examples**

```
library(baseflow)

# Loading example data from airGR package
data(L0123001, package = 'airGR')

# Defining BasinData object

Name <- BasinInfo$BasinName
startDate <- BasinObs$DatesR[1]
endDate <- BasinObs$DatesR[length(BasinObs$DatesR)]
P <- BasinObs$P
PET <- BasinObs$E
Qobs <- BasinObs$Qmm

BasinData_Example <- BasinData(Name, startDate, endDate, P, PET, Qobs, fill = "GR4J")

# Creating BaseflowFilter object
BaseflowFilter_Example <- BaseflowFilter(BasinData_Example, 1000, updateFunction = 'quadr')

# Computing baseflow
BaseflowFilter_Example <- perform_filtering(BaseflowFilter_Example)

# Plotting computed separation
plot(BaseflowFilter_Example)
```

---

BaseflowFilter-class    *Class* BaseflowFilter

---

**Description**

Class used by package *baseflow* to store results of a baseflow filtering for a given catchment.

**Objects from the Class**

Objects can be created by calls of the form `new("BaseflowFilter", ...)`, but it is recommended to use `BaseflowFilter` function to create this object.

**Slots**

**BasinData:** Object of class "BasinData" giving hydroclimatic data of catchment (see [BasinData-class](#)).

**R:** Vector of class "numeric" giving filtered baseflow.

**V:** Vector of class "numeric" giving storage of the conceptual reservoir.

**update:** Vector of class "logical", TRUE at timesteps in which reservoir's level is updated, FALSE otherwise.

**updateFunction:** Object of class "character" equal to "quadr", "lin" or "exp", giving the nature of the conceptual reservoir.

**alpha:** Object of class "numeric" : value of "alpha" reservoir parameter.

**Methods**

**as.data.frame** signature(x = "BaseflowFilter"): transforms object into dataframe.

**plot** signature(x = "BaseflowFilter"): plots baseflow separation on the hydrograph.

**print** signature(x = "BaseflowFilter"): prints object to console.

**show** signature(object = "BaseflowFilter"): shows object in console.

**summary** signature(object = "BaseflowFilter"): shows a summary of the object.

**Author(s)**

Pelletier and Andreassian (<antoine.pelletier@irstea.fr>)

**References**

Pelletier, A. and Andréassian, V.: Hydrograph separation: an impartial parametrization for an imperfect method, Hydrol. Earth Syst. Sci. Discuss., <https://doi.org/10.5194/hess-2019-503>, in review, 2019

**See Also**

[BaseflowFilter](#)

[perform\\_filtering](#)

[BasinData](#)

**Examples**

```
showClass("BaseflowFilter")
```

---

|           |                                                |
|-----------|------------------------------------------------|
| BasinData | <i>Constructor function of class BasinData</i> |
|-----------|------------------------------------------------|

---

### Description

Standard construction function of BasinData objects, used by package baseflow to store daily hydroclimatic data for a given catchment. As the separation algorithm proposed in baseflow does not handle missing streamflow values, a filling routine using airGR package is provided.

### Usage

```
BasinData(Name, startDate, endDate, P, PET, Qobs, fill = "none")
```

### Arguments

|           |                                                                                                                                            |
|-----------|--------------------------------------------------------------------------------------------------------------------------------------------|
| Name      | Character string giving the name of the catchment. Can be a code or a plain-text description.                                              |
| startDate | Starting date of hydroclimatic data as a POSIXct object.                                                                                   |
| endDate   | End date of hydroclimatic data as a POSIXct object.                                                                                        |
| P         | Numeric vector giving daily total lumped precipitation over the catchment, in mm. Must be of the same length as PET and Qobs.              |
| PET       | Numeric vector giving daily total lumped potential evapotranspiration over the catchment, in mm. Must be of the same length as P and Qobs. |
| Qobs      | Numeric vector giving daily streamflow of the catchment, as depth of runoff in mm. Must be of the same length as PET and Qobs.             |
| fill      | Character string describing filling methods. Must be one of the following : "none" (no filling, default), "GR4J", "GR5J" or "GR6J".        |

### Details

The expected length of data vectors is equal to the number of days between the two provided dates. It is recommended to store data into a data frame before using this function. This function does not handle missing values : any NA will produce an error. If there are missing values in streamflow, the fill argument must be different from "none". Filling routine requires airGR package. One of the following hydrological lumped models can be used : GR4J, GR5J or GR6J. See airGR documentation for further details.

### Value

A BasinData object containing provided data.

### Author(s)

Pelletier and Andreassian (<antoine.pelletier@irstea.fr>)

## References

Pelletier, A. and Andréassian, V.: Hydrograph separation: an impartial parametrization for an imperfect method, Hydrol. Earth Syst. Sci. Discuss., <https://doi.org/10.5194/hess-2019-503>, in review, 2019

## See Also

[BasinData](#)  
[BaseflowFilter](#)  
[BaseflowFilter](#)

## Examples

```
library(baseflow)

# Loading example data from airGR package
data(L0123001, package = 'airGR')

# Defining BasinData object

Name <- BasinInfo$BasinName
startDate <- BasinObs$DatesR[1]
endDate <- BasinObs$DatesR[length(BasinObs$DatesR)]
P <- BasinObs$P
PET <- BasinObs$E
Qobs <- BasinObs$Qmm

BasinData_Example <- BasinData(Name, startDate, endDate, P, PET, Qobs, fill = "GR4J")
```

---

|                 |                 |
|-----------------|-----------------|
| BasinData-class | Class BasinData |
|-----------------|-----------------|

---

## Description

Class used by package *baseflow* to store hydroclimatic data from a given catchment.

## Objects from the Class

Objects can be created by calls of the form `new("BasinData", ...)`, but it is recommended to use `BasinData` function to create this object.

## Slots

**Name:** Object of class "character" giving the name of the catchment (e.g. 'Seine in Paris')  
**Dates:** Vector of "POSIXct" dates giving timestamps of measures  
**nbTimeStep:** Object of class "integer" giving the number of measures  
**P:** Vector of total precipitation of length 'nbTimeStep'  
**PET:** Vector of potential evapotranspiration of length 'nbTimeStep'  
**Qobs:** Vector of observed streamflow of length 'nbTimeStep'

## Methods

**as.data.frame** signature(x = "BasinData"): transforms object into a data frame.

**print** signature(x = "BasinData"): prints object to console

**show** signature(object = "BasinData"): shows object

**summary** signature(object = "BasinData"): show a summary of object

## Author(s)

Pelletier and Andreassian (<antoine.pelletier@irstea.fr>)

## References

Pelletier, A. and Andréassian, V.: Hydrograph separation: an impartial parametrization for an imperfect method, Hydrol. Earth Syst. Sci. Discuss., <https://doi.org/10.5194/hess-2019-503>, in review, 2019

## See Also

[BasinData](#)

[BaseflowFilter](#)

## Examples

```
showClass("BasinData")
```

---

bfi

*Baseflow index computing function*

---

## Description

Function provided by package baseflow to compute baseflow index from a BaseflowFilter object.

## Usage

```
bfi(filter)
```

## Arguments

**filter** A BaseflowFilter object created by BaseflowFilter function.

## Details

Computes baseflow index from a BaseflowFilter object, created by BaseflowFilter function. If the baseflow values have not been computed yet in the object, a Rust routine is called to compute baseflow ; else, baseflow is computed directly from baseflow and observed streamflow values. Providing a non-BaseflowFilter object creates an error.



**Value**

A numeric giving computed baseflow index.

**Author(s)**

Pelletier and Andreassian (<antoine.pelletier@irstea.fr>)

**References**

Pelletier, A. and Andréassian, V.: Hydrograph separation: an impartial parametrization for an imperfect method, Hydrol. Earth Syst. Sci. Discuss., <https://doi.org/10.5194/hess-2019-503>, in review, 2019

**See Also**

[BaseflowFilter](#)  
[BaseflowFilter](#)  
[perform\\_filtering](#)

**Examples**

```
library(baseflow)

# Loading example data from airGR package
data(L0123001, package = 'airGR')

# Defining BasinData object

Name <- BasinInfo$BasinName
startDate <- BasinObs$DatesR[1]
endDate <- BasinObs$DatesR[length(BasinObs$DatesR)]
P <- BasinObs$P
PET <- BasinObs$E
Qobs <- BasinObs$Qmm

BasinData_Example <- BasinData(Name, startDate, endDate, P, PET, Qobs, fill = "GR4J")

# Creating BaseflowFilter object
BaseflowFilter_Example <- BaseflowFilter(BasinData_Example, 1000, updateFunction = 'quadr')

# Computing baseflow
BaseflowFilter_Example <- perform_filtering(BaseflowFilter_Example)

# Plotting computed separation
plot(BaseflowFilter_Example)

# Computing baseflow index
bfi(BaseflowFilter_Example)
```

---

|           |                                                   |
|-----------|---------------------------------------------------|
| corr_crit | <i>Baseflow correlation criterion computation</i> |
|-----------|---------------------------------------------------|

---

### Description

Computation function of correlation criterion used by package `baseflow` to calibrate parameters of the baseflow separation algorithm. A vectorized version of this function `correlation_criteria_vectorized` also exists.

### Usage

```
corr_crit(BasinData, alpha, tau, updateFunction = "quadr")
```

### Arguments

|                             |                                                                                                                                                   |
|-----------------------------|---------------------------------------------------------------------------------------------------------------------------------------------------|
| <code>BasinData</code>      | A <code>BasinData</code> object containing hydroclimatic data for the catchment under study.                                                      |
| <code>alpha</code>          | Numeric parameter of the filtering reservoir. Its dimension depends on the used update function. Must be positive.                                |
| <code>tau</code>            | Number of days used to compute cumulative effective rainfall. Must be a positive integer or any object that can be coerced to a positive integer. |
| <code>updateFunction</code> | Character string giving reservoir function : must be one of "quadr", "lin" or "exp". Default is "quadr".                                          |

### Details

NA values are not permitted for parameters `alpha` and `tau`. If a vector is supplied, the first element is used.

Usage of gradient-based optimization algorithms is not recommended to find the maximum value of this criterion. It is a better option to use vectorized function `correlation_criteria_vectorized` to perform a grid-search; a non-gradient-based optimization algorithm, like differential evolution, may be used to refine the optimal point afterwards.

### Value

A numeric value of the computed criterion, between -1 and 1.

### Author(s)

Pelletier and Andreassian (<antoine.pelletier@irstea.fr>)

### References

Pelletier, A. and Andréassian, V.: Hydrograph separation: an impartial parametrization for an imperfect method, *Hydrol. Earth Syst. Sci. Discuss.*, <https://doi.org/10.5194/hess-2019-503>, in review, 2019

**See Also**

[perform\\_filtering](#)  
[BaseflowFilter](#)  
[corr\\_crit\\_vect](#)  
[bfi](#)

**Examples**

```

library(baseflow)

# Loading example data from airGR package
data(L0123001, package = 'airGR')

# Defining BasinData object

Name <- BasinInfo$BasinName
startDate <- BasinObs$DatesR[1]
endDate <- BasinObs$DatesR[length(BasinObs$DatesR)]
P <- BasinObs$P
PET <- BasinObs$E
Qobs <- BasinObs$Qmm

BasinData_Example <- BasinData(Name, startDate, endDate, P, PET, Qobs, fill = "GR4J")

# Computing correlation criterion
corr_crit(BasinData_Example, 1500, 110, updateFunction = "quadr")

```

---

corr\_crit\_vect

*Baseflow vectorized correlation criteria computation*


---

**Description**

Vectorized computation function of correlation criteria used by package baseflow to calibrate parameters of the baseflow separation algorithm. A scalar version of this function `correlation_criteria` also exists.

**Usage**

```
corr_crit_vect(BasinData, alphas, taus, updateFunction = "quadr")
```

**Arguments**

|           |                                                                                                                                      |
|-----------|--------------------------------------------------------------------------------------------------------------------------------------|
| BasinData | A BasinData object containing hydroclimatic data for the catchment under study.                                                      |
| alphas    | Numeric vector of parameters of the filtering reservoir. Their dimension depends on the used update function. They must be positive. |

|                |                                                                                                                                                                                         |
|----------------|-----------------------------------------------------------------------------------------------------------------------------------------------------------------------------------------|
| taus           | Vector of numbers of days used to compute cumulative effective rainfall. Must be an integer vector or any object that can be coerced to an integer vector. All values must be positive. |
| updateFunction | Character string giving reservoir function : must be one of "quadr", "lin" or "exp". Default is "quadr".                                                                                |

### Details

Providing empty vectors or vectors containing missing or non-positive values for parameters alphas and taus throws an error.

### Value

A dataframe containing four columns and  $\text{length}(\text{alphas}) * \text{length}(\text{taus})$  rows. Columns are the following:

|       |                                                  |
|-------|--------------------------------------------------|
| alpha | Values of alpha                                  |
| tau   | Values of tau                                    |
| bfi   | Values of baseflow index, which depends on alpha |
| crit  | Computed values of correlation criterion         |

### Author(s)

Pelletier and Andreassian (<antoine.pelletier@irstea.fr>)

### References

Pelletier, A. and Andréassian, V.: Hydrograph separation: an impartial parametrization for an imperfect method, Hydrol. Earth Syst. Sci. Discuss., <https://doi.org/10.5194/hess-2019-503>, in review, 2019

### See Also

[perform\\_filtering](#)  
[BaseflowFilter](#)  
[corr\\_crit](#)  
[bfi](#)

### Examples

```
library(baseflow)

# Loading example data from airGR package
data(L0123001, package = 'airGR')

# Defining BasinData object

Name <- BasinInfo$BasinName
startDate <- BasinObs$DatesR[1]
```

```
endDate <- BasinObs$DatesR[length(BasinObs$DatesR)]
P <- BasinObs$P
PET <- BasinObs$E
Qobs <- BasinObs$Qmm

BasinData_Example <- BasinData(Name, startDate, endDate, P, PET, Qobs, fill = "GR4J")

# Computing correlation criteria
data_crit <- corr_crit_vect(BasinData_Example,
                           alphas = seq(from = 100, to = 2000, by = 100),
                           taus = seq(from = 10, to = 370, by = 10),
                           updateFunction = "quadr")
```

---

perform\_filtering      *Baseflow filtering function*

---

### Description

Function provided by package `baseflow` to compute baseflow variables from a raw `BaseflowFilter` object. It must be called after calling the `BaseflowFilter` function.

### Usage

```
perform_filtering(filter)
```

### Arguments

`filter`            A `BaseflowFilter` object created by `BaseflowFilter` function.

### Details

Providing a non-`BaseflowFilter` object creates an error. The function calls a Rust routine to compute vectors `R` (baseflow) and `V` (reservoir level) from parameters and hydroclimatic data stored in `filter` object.

### Value

A `BaseflowFilter` object with the same parameters and `BasinData` slots as input, but `R`, `V` and update slots are replaced by computed values.

### Author(s)

Pelletier and Andreassian (<antoine.pelletier@irstea.fr>)

### References

Pelletier, A. and Andréassian, V.: Hydrograph separation: an impartial parametrization for an imperfect method, *Hydrol. Earth Syst. Sci. Discuss.*, <https://doi.org/10.5194/hess-2019-503>, in review, 2019

**See Also**[BaseflowFilter](#)[BaseflowFilter](#)[bfi](#)**Examples**

```
library(baseflow)

# Loading example data from airGR package
data(L0123001, package = 'airGR')

# Defining BasinData object

Name <- BasinInfo$BasinName
startDate <- BasinObs$DatesR[1]
endDate <- BasinObs$DatesR[length(BasinObs$DatesR)]
P <- BasinObs$P
PET <- BasinObs$E
Qobs <- BasinObs$Qmm

BasinData_Example <- BasinData(Name, startDate, endDate, P, PET, Qobs, fill = "GR4J")

# Creating BaseflowFilter object
BaseflowFilter_Example <- BaseflowFilter(BasinData_Example, 1000, updateFunction = 'quadr')

# Computing baseflow
BaseflowFilter_Example <- perform_filtering(BaseflowFilter_Example)

# Plotting computed separation
plot(BaseflowFilter_Example)
```

# Index

## \*Topic **classes**

BaseflowFilter-class, [3](#)

BasinData-class, [6](#)

## \*Topic **manip**

BaseflowFilter, [2](#)

BasinData, [5](#)

bfi, [7](#)

corr\_crit, [9](#)

corr\_crit\_vect, [10](#)

perform\_filtering, [12](#)

as.data.frame,BaseflowFilter-method  
(BaseflowFilter-class), [3](#)

as.data.frame,BasinData-method  
(BasinData-class), [6](#)

BaseflowFilter, [2](#), [3](#), [4](#), [6–8](#), [10](#), [11](#), [13](#)

BaseflowFilter-class, [3](#)

BasinData, [3](#), [4](#), [5](#), [6](#), [7](#)

BasinData-class, [4](#), [6](#)

bfi, [7](#), [10](#), [11](#), [13](#)

corr\_crit, [9](#), [11](#)

corr\_crit\_vect, [10](#), [10](#)

perform\_filtering, [3](#), [4](#), [8](#), [10](#), [11](#), [12](#)

plot,BaseflowFilter-method  
(BaseflowFilter-class), [3](#)

print,BaseflowFilter-method  
(BaseflowFilter-class), [3](#)

print,BasinData-method  
(BasinData-class), [6](#)

show,BaseflowFilter-method  
(BaseflowFilter-class), [3](#)

show,BasinData-method  
(BasinData-class), [6](#)

summary,BaseflowFilter-method  
(BaseflowFilter-class), [3](#)

summary,BasinData-method  
(BasinData-class), [6](#)
